# Supplementary material for: Change in sprint cycling torque is not associated with change in isometric force following six weeks of sprint cycling and resistance training in strength‐trained novice cyclists
Source: PubMed Central journal article supplement (PMC11534655; doi:10.1002/ejsc.12203), 2024-10-16
Supplement: EJSC-24-1604-s001.pdf [file EJSC-24-1604-s001.pdf]

**Supplementary Table 1.** Summary of the generic sprint cycling training prescription. Session details below as number of sets x [repetitions x duration/rest between repetitions]/rest between sets.

| <b>Session</b> | <b>Description</b>              | <b>Week 1</b>                        | <b>Week 2</b>                        | <b>Week 3</b>                        | <b>Week 4</b>                        | <b>Week 5</b>                        | <b>Week 6</b>                        |
|----------------|---------------------------------|--------------------------------------|--------------------------------------|--------------------------------------|--------------------------------------|--------------------------------------|--------------------------------------|
| 1              | Low Torque, low resistance      | 1 x<br>[5 x 5 s/<br>5 min]           | 1 x<br>[4 x 8 s/<br>5 min]           | 1 x<br>[5 x 8 s/<br>5 min]           | 1 x<br>[5 x 8 s/<br>5 min]           | 1 x<br>[6 x 5 s/<br>5 min]           | 1 x<br>[4 x 5 s/<br>5 min]           |
| 2              | High Torque, high resistance    | 4 x<br>[2 x 8 s/<br>1 min]<br>/5 min | 4 x<br>[2 x 8 s/<br>1 min]<br>/5 min | 5 x<br>[2 x 8 s/<br>1 min]<br>/5 min | 5 x<br>[2 x 8 s/<br>1 min]<br>/5 min | 4 x<br>[2 x 8 s/<br>1 min]<br>/5 min | 3 x<br>[2 x 8 s/<br>1 min]<br>/5 min |
| 3              | High Power, moderate resistance | 4 x<br>[2 x 6 s/<br>1 min]<br>/5 min | 5 x<br>[2 x 6 s/<br>1 min]<br>/5 min | 6 x<br>[2 x 6 s/<br>1 min]<br>/5 min | 6 x<br>[2 x 6 s/<br>1 min]<br>/5 min | 5 x<br>[2 x 6 s/<br>1 min]<br>/5 min | 3 x<br>[2 x 6 s/<br>1 min]<br>/5 min |
