# Supplementary material for: Change in sprint cycling torque is not associated with change in isometric force following six weeks of sprint cycling and resistance training in strength‐trained novice cyclists
Source: PubMed Central journal article supplement (PMC11534655; doi:10.1002/ejsc.12203), 2024-10-16
Supplement: EJSC-24-1604-s002.pdf [file EJSC-24-1604-s002.pdf]

**Supplementary Figure 1.** Summary of the generic resistance training prescription. \*=repetitions on each side

| Session             | Exercise                            |            | Week 1      | Week 2     | Week 3     | Week 4     | Week 5           | Week 6      |
|---------------------|-------------------------------------|------------|-------------|------------|------------|------------|------------------|-------------|
| 1                   | Back squat                          | Sets       |             | 3          | 3          | 3          | 3                |             |
|                     |                                     | Reps       | 3RM testing | 5, 5, 5    | 5, 5, 5    | 5, 5, 5    | 5, 5, 5          | 3RM testing |
|                     |                                     | % 3RM      |             | 70, 75, 80 | 75, 80, 85 | 80, 85, 90 | 72.5, 77.5, 82.5 |             |
|                     | Box step up                         | Sets       | 3           | 3          | 3          | 3          | 3                | 3           |
|                     |                                     | Reps*      | 5, 5, 5     | 5, 5, 5    | 5, 5, 5    | 5, 5, 5    | 5, 5, 5          | 5, 5, 5     |
|                     | Barbell pendlay row                 | Sets       | 3           | 3          | 3          | 3          | 3                | 3           |
|                     |                                     | Reps       | 5, 5, 5     | 5, 5, 5    | 5, 5, 5    | 5, 5, 5    | 5, 5, 5          | 5, 5, 5     |
|                     | Single-leg RDL                      | Sets       | 3           | 3          | 3          | 3          | 3                | 3           |
|                     |                                     | Reps*      | 5, 5, 5     | 5, 5, 5    | 5, 5, 5    | 5, 5, 5    | 5, 5, 5          | 5, 5, 5     |
|                     | Calf raises (straight leg)          | Sets       | 3           | 3          | 3          | 3          | 3                | 3           |
|                     |                                     | Reps*      | 5, 5, 5     | 5, 5, 5    | 5, 5, 5    | 5, 5, 5    | 5, 5, 5          | 5, 5, 5     |
|                     | Back extensions                     | Sets       | 3           | 3          | 3          | 3          | 3                | 3           |
| Reps                |                                     | 15, 15, 15 | 15, 15, 15  | 18, 18, 18 | 18, 18, 18 | 20, 20, 20 | 20, 20, 20       |             |
| Glute bridge        | Sets                                | 3          | 3           | 3          | 3          | 3          | 3                |             |
|                     | Reps                                | 15, 15, 15 | 15, 15, 15  | 18, 18, 18 | 18, 18, 18 | 20, 20, 20 | 20, 20, 20       |             |
| 2                   | Trap bar deadlift                   | Sets       |             | 3          | 3          | 3          | 3                |             |
|                     |                                     | Reps       | 3RM testing | 5, 5, 5    | 5, 5, 5    | 5, 5, 5    | 5, 5, 5          | 3RM testing |
|                     |                                     | % 3RM      |             | 70, 75, 80 | 75, 80, 85 | 80, 85, 90 | 72.5, 77.5, 82.5 |             |
|                     | Hip thrusts                         | Sets       | 3           | 3          | 3          | 3          | 3                | 3           |
|                     |                                     | Reps       | 5, 5, 5     | 5, 5, 5    | 5, 5, 5    | 5, 5, 5    | 5, 5, 5          | 5, 5, 5     |
|                     | Rear foot elevated split squat      | Sets       | 3           | 3          | 3          | 3          | 3                | 3           |
|                     |                                     | Reps*      | 5, 5, 5     | 5, 5, 5    | 5, 5, 5    | 5, 5, 5    | 5, 5, 5          | 5, 5, 5     |
|                     | Barbell bench press                 | Sets       | 3           | 3          | 3          | 3          | 3                | 3           |
|                     |                                     | Reps       | 5, 5, 5     | 5, 5, 5    | 5, 5, 5    | 5, 5, 5    | 5, 5, 5          | 5, 5, 5     |
|                     | Quad superman                       | Sets       | 3           | 3          | 3          | 3          | 3                | 3           |
|                     |                                     | Reps       | 15, 15, 15  | 15, 15, 15 | 18, 18, 18 | 18, 18, 18 | 20, 20, 20       | 20, 20, 20  |
|                     | Russian twists                      | Sets       | 3           | 3          | 3          | 3          | 3                | 3           |
| Reps                |                                     | 50, 50, 50 | 50, 50, 50  | 60, 60, 60 | 60, 60, 60 | 70, 70, 70 | 70, 70, 71       |             |
| 3                   | Back squat                          | Sets       | 3           | 3          | 3          | 3          | 3                | 3           |
|                     |                                     | Reps       | 5, 5, 5     | 5, 5, 5    | 5, 5, 5    | 5, 5, 5    | 5, 5, 5          | 5, 5, 5     |
|                     |                                     | % 3RM      | 60, 65, 70  | 60, 65, 70 | 65, 70, 75 | 70, 75, 80 | 62, 66, 70       | 62, 66, 70  |
|                     | Dynamic clean pull (from mid-thigh) | Sets       | 3           | 3          | 3          | 3          | 3                | 3           |
|                     |                                     | Reps       | 5, 5, 5     | 5, 5, 5    | 5, 5, 5    | 5, 5, 5    | 5, 5, 5          | 5, 5, 5     |
|                     | Barbell lunge press                 | Sets       | 3           | 3          | 3          | 3          | 3                | 3           |
|                     |                                     | Reps*      | 5, 5, 5     | 5, 5, 5    | 5, 5, 5    | 5, 5, 5    | 5, 5, 5          | 5, 5, 5     |
|                     | Pull-ups                            | Sets       | 3           | 3          | 3          | 3          | 3                | 3           |
|                     |                                     | Reps       | 5, 5, 5     | 5, 5, 5    | 5, 5, 5    | 5, 5, 5    | 5, 5, 5          | 5, 5, 5     |
|                     | Calf raises (with bent knee)        | Sets       | 3           | 3          | 3          | 3          | 3                | 3           |
|                     |                                     | Reps*      | 5, 5, 5     | 5, 5, 5    | 5, 5, 5    | 5, 5, 5    | 5, 5, 5          | 5, 5, 5     |
|                     | Back hyperextension                 | Sets       | 3           | 3          | 3          | 3          | 3                | 3           |
| Reps                |                                     | 15, 15, 15 | 15, 15, 16  | 18, 18, 18 | 18, 18, 18 | 20, 20, 20 | 20, 20, 20       |             |
| Medicine ball slams | Sets                                | 3          | 3           | 3          | 3          | 3          | 3                |             |
|                     | Reps                                | 40, 40, 40 | 40, 40, 40  | 50, 50, 50 | 50, 50, 50 | 60, 60, 60 | 60, 60, 60       |             |

**Warm up:**

2-min skipping; world's greatest stretch (8 each side); 2 sets x 10 reps body weight squats; 5 reps Inchworms; 2 sets of 10 reps walking lunges; banded Lateral shuffles (20 each side); 10 Push Ups; Shoulder taps (5 each side).

**Plyometrics:**

Session 1, Body weight vertical jump with arms; Session 2, Split squat jump; Session 3, Jump squat with 20kg barbell (Weeks 1-4, 2 sets x 4 reps; Weeks 5-6, 3 sets x 4 reps)
